# Supplementary material for: Riverine Sediment Response to Deforestation in the Amazon Basin
Source: Copernicus journal article supplement (doi:10.5194/egusphere-2023-2271), 2023-11-08
Supplement: Supplementary file 1 [file egusphere-2023-2271-supplement.pdf]

## **1. Supplemental Information for Remote Sensing of Sediment**

Below is supplemental methods information based on Gardner et al., (2023).

### **1.1 Image Analysis:**

Extraction of Rs was automated using Google Earth Engine via its python (v3.7.3) API (ee package v1.7.9), accounting for fluctuating river position, size, topographic shadows, clouds, cloud shadow, snow, ice, and river obstructions to extract only high-quality open water river channel pixels. The dynamic surface water extent (DSWE) algorithm (Jones, 2019) was used to identify open water river pixels in each image. The Landsat quality assessment band generated by FMask was used to mask clouds, cloud shadow, snow, and ice (Foga et al., 2017; Zhu et al., 2015). To account for differences in band centers and ranges of different Landsat sensors, we corrected Rs from Landsat 5 and 8 to match Landsat 7 following Gardner et al. (2021) and (Topp et al., 2021). We applied the same procedure to extract Rs over field measurement sites to generate matchups provided using a 500 m buffer around site coordinates.

### **1.2 SSC machine learning algorithm:**

To provide representative data for training, testing, and validation, matchups were stratified into groups with approximately equal amounts of data based on SSC magnitude, site coordinates, and day of year. Within each unique combination of SSC magnitude, spatial group, and temporal group, 90% of the match-ups were randomly selected for training and validation (n=985) and the remaining 10% (n=109) were set aside as test hold-outs that are never used in training. The number of bins, also used as spatial-temporal cross validation folds, were chosen to balance an adequate amount of training data within each group while having groups that capture spatial and temporal variability in SSC across the US. Xgboost was chosen because it outperformed other ML algorithms in remote sensing applications (Cao et al., 2022; Fan et al., 2020; Georganos et al., 2018) and was used in a related study using a similar approach with USGS Landsat T1-SR (Gardner et al., 2023; Topp et al., 2021). LLLTO-CV is critical for models that make spatial predictions by cross-validating the model on locations and times that were not used for model training to reduce overfitting and spatial-temporal bias (Meyer et al., 2018; Meyer et al., 2019). FFS reduces overfitting by building models with all combinations of input

features while penalizing complexity to find the optimal, minimum number of features. We input Landsat's six common optical bands and 55 different spectral indices used in remote sensing of water quality for a total of 61 potential features.

### **1.3 Limitations:**

Our remote sensing approach has limitations including use of land-based atmospheric corrections, adjacency effects, sunglint, and bottom reflectance (Mouw et al., 2015; Zheng and DiGiacomo, 2017). The Landsat 8 Surface Reflectance Correction (LaSRC) atmospheric correction algorithm performs as well as aquatic-based correction algorithms (e.g. SeaDAS, ACOLITE) for water quality applications (Kuhn et al., 2019). Many studies have successfully retrieved water quality observations from USGS T1-SR over regional to global extents using data-driven approaches (Dethier et al., 2020; Dethier et al., 2022; Olmanson et al., 2020; Topp et al., 2021). Adjacency effects in Landsat may be less severe over narrower waters such as rivers (Pahlevan et al., 2018). Sunglint may impact a small fraction of images and is minimized by calculating median reflectance values over reaches. Bottom reflectance may impact  $R_s$ , but likely only in clear rivers without vegetation since we remove vegetated water pixels using DSWE (Jones, 2015; Jones, 2019). In Gardner et al., (2021), we evaluated the potential impacts of adjacency and bottom effects by repeating trend analyses in river color for all rivers vs. rivers  $> 120$  m, assuming the widest rivers would be deep and/or turbid enough that bottom reflectance would be minimized and found no changes in trends in river color based on river size. There are further limitations for general users of the RivSed-Amazon database. Our SSC observations only represent concentration near the surface. In very turbid rivers, our observations may only integrate over centimeters of the water column and therefore typically represent the concentration of fine sediments. Our goal was to make a coherent, basin-wide SSC database that is temporally or spatially consistent for scientific analysis. While we strive for accuracy, any given SSC observation might not be locally accurate enough for decision making that requires exact SSC thresholds. Note, our satellite observations are measuring a different spatial scale than field measurements, spatially averaging SSC over reaches (median length = 10 km) of river surface area whereas field measurements represent a discrete point. RivSed observations are designed to be comparable with each other over time and space. The SSC algorithm will underestimate SSC in the high range ( $> 2,000$  mg/L). We are working to resolve these issues and

produce future versions of our SSC model and database that will be updated to Landsat collection 2, include Landsat 9, predict over a wider range of SSC, and/or be produced globally over the footprint of SWORD, river reaches.

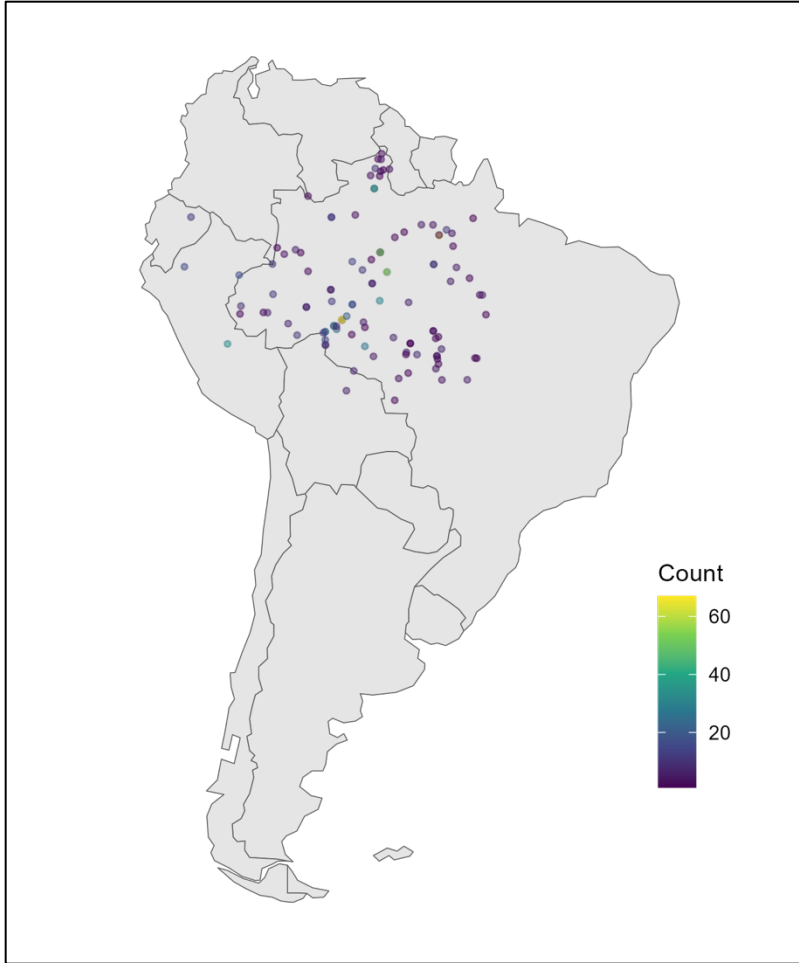

**Figure S1. Locations and observation density of satellite/in-situ match-ups used to build and validate the SSC algorithm.**

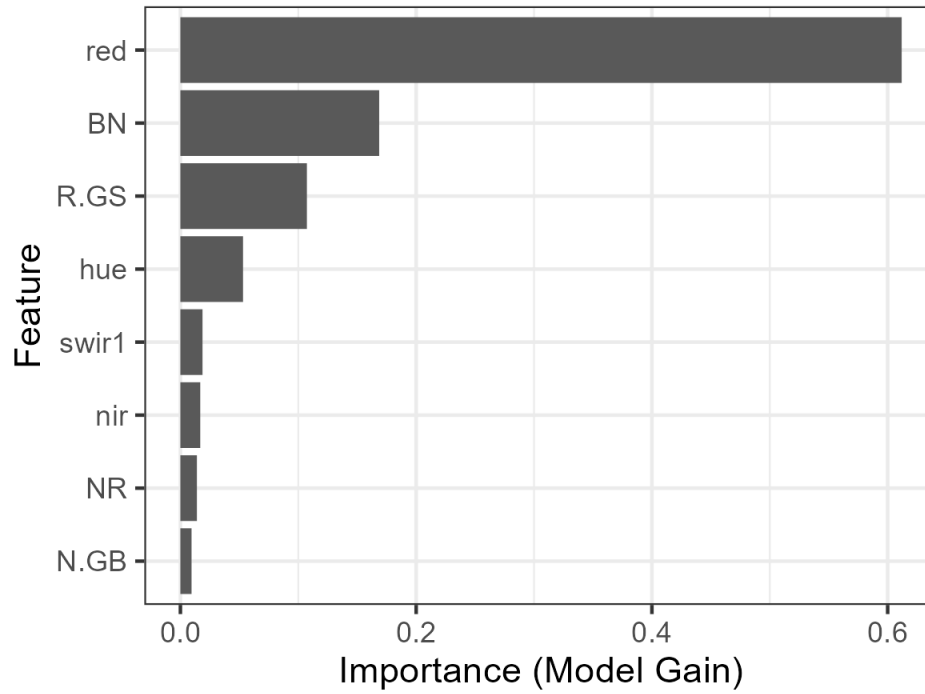

**Figure S2. Feature Importance of the bands and spectral indices used in the final Xgboost regression algorithm for predicting SSC.** These bands were chosen by forward-feature selection. red=red band; BN = blue/nir; R.GS = red/(green + swir1); hue = hue from the hsv colorspace calculated using rgb2hsv() function in R using the red, green, and blue bands; swir1= shortwave infrared 1; nir = near infrared; NR = nir/red; N.GB = nir/ (green +blue)

## 2. Supplemental Figures of fine scale SSC trend and lag analyses

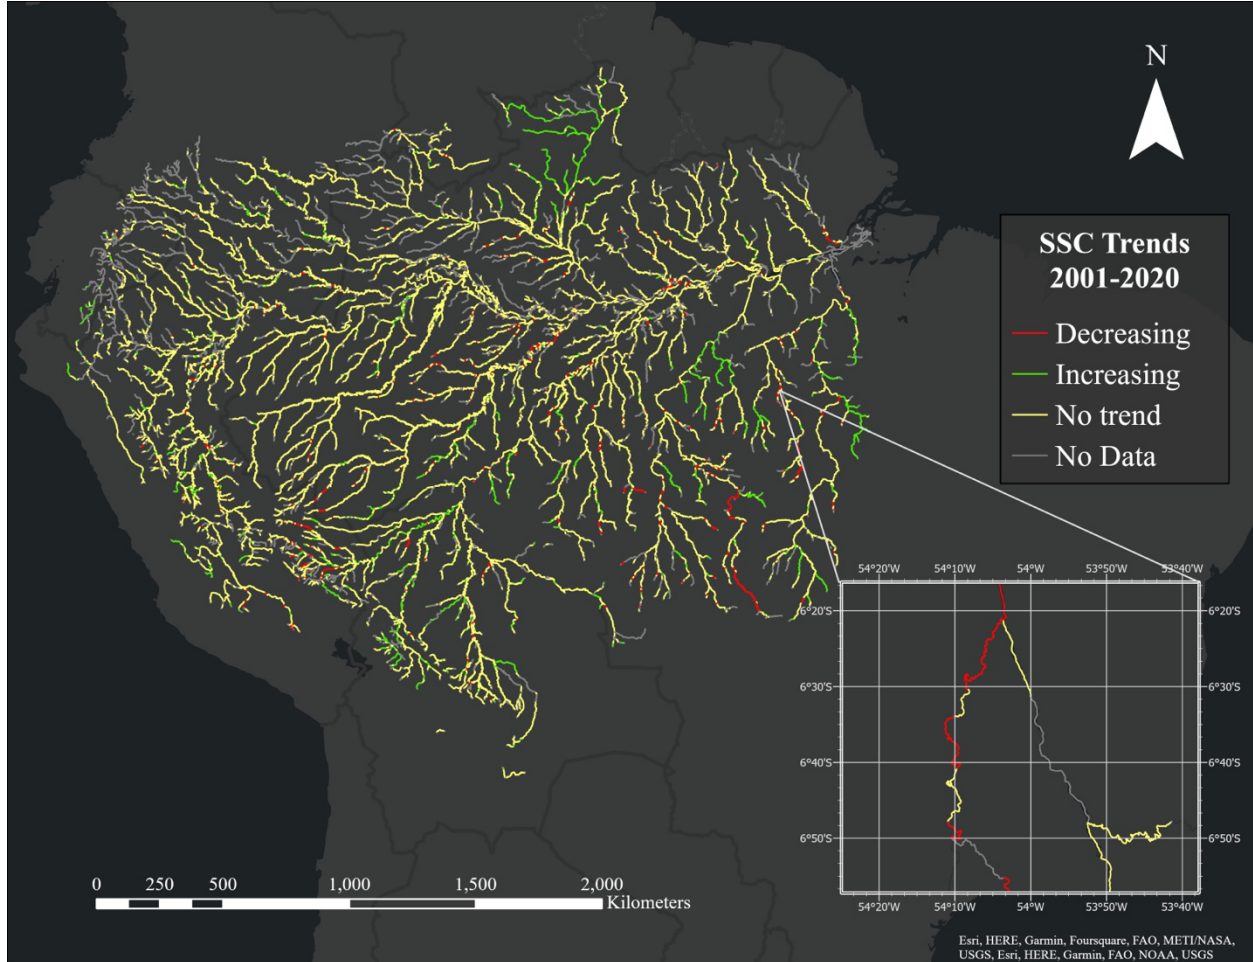

**Figure S3.** Reach level SSC trends for 2001-2020. Trends were calculated using a Mann-Kendall test on the median SSC recording for each year. The inset map shown in the bottom right of the figure provides an example of the heterogeneous trends observed at the river reach scale.

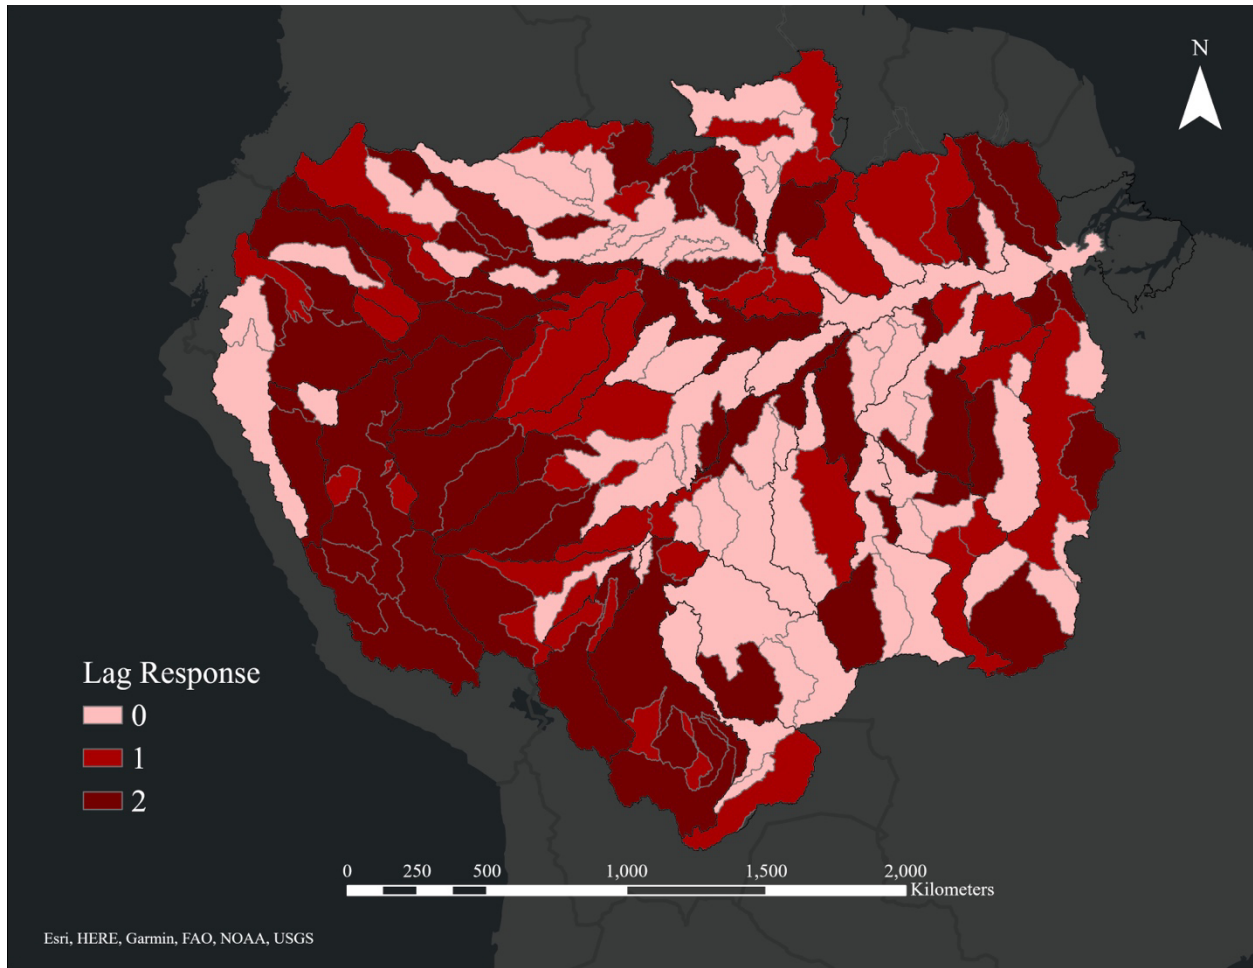

**Figure S4. Lag Responses by year found in Amazonian minor tributary basins (2001-2020). Major tributary basins containing their respective minor tributary basins are delineated in black.**

## Supplemental References:

Altenau, E. H., Pavelsky, T. M., Durand, M. T., Yang, X., Frasson, R. P. d. M., and Bendezu, L.: The Surface Water and Ocean Topography (SWOT) Mission River Database (SWORD): A global river network for satellite data products, *57*, *Water Resour. Res.*, <https://doi.org/10.1029/2021WR030054>, 2021.

Cao, J., Wang, H., Li, J., Tian, Q., and Niyogi, D.: Improving the forecasting of winter wheat yields in Northern China with machine learning—dynamical hybrid subseasonal-to-seasonal ensemble prediction, *Remote Sens.*, *14*, 1707, <https://doi.org/10.3390/rs14071707>, 2022.

Dethier, E. N., Renshaw, C. E. and Magilligan, F. J.: Toward Improved Accuracy of Remote Sensing Approaches for Quantifying Suspended Sediment: Implications for Suspended-Sediment Monitoring, *J. Geophys. Res. Earth Surf.*, *125*, 7, <https://doi.org/10.1029/2019jf005033>, 2020.

Dethier, E. N., Renshaw, C. E. and Magilligan, F. J.: Rapid changes to global river suspended sediment flux by humans, *Science*, *376*, 1447–1452, <https://doi.org/10.1126/science.abn7980>, 2022.

Fan, Z., Zhan, Q., Yang, C., Liu, H. and Bilal, M.: Estimating PM<sub>2.5</sub> Concentrations Using Spatially Local Xgboost Based on Full-Covered SARA AOD at the Urban Scale, *Remote Sens.*, *12*, 3368, <https://doi.org/10.3390/rs12203368>, 2020.

Foga, S., Scaramuzza, P. L., Guo, S., Zhu, Z., Dilley, R. D., Jr, Beckmann, T., Schmidt, G. L., Dwyer, J. L., Joseph Hughes, M. and Laue, B.: Cloud detection algorithm comparison and validation for operational Landsat data products, *Remote Sens. Environ.*, *194*, 379–390, <https://doi.org/10.1016/j.rse.2017.03.026>, 2017.

Gardner, J. R., Yang, X., Topp, S. N., Ross, M. R. V., Altenau, E. H., and Pavelsky, T. M.: The Color of Rivers, *Geophys. Res. Lett.*, *48*, <https://doi.org/10.1029/2020gl088946>, 2021.

Gardner, J., Pavelsky, T., Topp, S., Yang, X., Ross, M. R. V., and Cohen, S. Human activities change suspended sediment concentration along rivers, *Environ. Res. Lett.*, *18*, 064032, <https://doi.org/10.1088/1748-9326/acd8d8>, 2023.

Georganos, S., Grippa, T., Vanhuysse, S., Lennert, M., Shimoni, M. and Wolff, E.: Very High Resolution Object-Based Land Use–Land Cover Urban Classification Using Extreme Gradient Boosting, *IEEE Geosci. Remote Sens. Lett.*, *15*, 607–611, <https://doi.org/10.1109/lgrs.2018.2803259>, 2018.

Jones, J.: Efficient Wetland Surface Water Detection and Monitoring via Landsat: Comparison with in situ Data from the Everglades Depth Estimation Network, *Remote Sens.*, *7*, 12503–12538, <https://doi.org/10.3390/rs70912503>, 2015.

Jones, J.: Improved Automated Detection of Subpixel-Scale Inundation—Revised Dynamic Surface Water Extent (DSWE) Partial Surface Water Tests, *Remote Sens.*, *11*, 374, <https://doi.org/10.3390/rs11040374>, 2019.

Kloiber, S. M., Brezonik, P. L., Olmanson, L. G. and Bauer, M. E.: A procedure for regional lake water clarity assessment using Landsat multispectral data, *Remote Sens. Environ.*, *82*, 38–47, [https://doi.org/10.1016/s0034-4257\(02\)00022-6](https://doi.org/10.1016/s0034-4257(02)00022-6), 2002.

Kuhn, C., de Matos Valerio, A., Ward, N., Loken, L., Sawakuchi, H. O., Kampel, M., Richey, J., Stadler, P., Crawford, J., Striegl, R., Vermote, E., Pahlevan, N. and Butman, D.: Performance of Landsat-8 and Sentinel-2



surface reflectance products for river remote sensing retrievals of chlorophyll-a and turbidity, *Remote Sens. Environ.*, 224, 104–118, <https://doi.org/10.1016/j.rse.2019.01.023>, 2019.

Meyer, H., Reudenbach, C., Hengl, T., Katurji, M. and Nauss, T.: Improving performance of spatio-temporal machine learning models using forward feature selection and target-oriented validation, *Environ. Model. Softw.*, 101, 1-9, <https://doi.org/10.1016/j.envsoft.2017.12.001>, 2018.

Meyer, H., Reudenbach, C., Wöllauer, S. and Nauss, T.: Importance of spatial predictor variable selection in machine learning applications – Moving from data reproduction to spatial prediction, *Ecol. Model.*, 411, 108815, <https://doi.org/10.1016/j.ecolmodel.2019.108815>, 2019.

Mouw, C. B., Greb, S., Aurin, D., DiGiacomo, P. M., Lee, Z., Twardowski, M., Binding, C., Hu, C., Ma, R., Moore, T., Moses, W. and Craig, S. E.: Aquatic color radiometry remote sensing of coastal and inland waters: Challenges and recommendations for future satellite missions, *Remote Sens. Environ.*, 160, 15–30, <https://doi.org/10.1016/j.rse.2015.02.001>, 2015.

Olmanson, L. G., Bauer, M. E. and Brezonik, P. L.: A 20-year Landsat water clarity census of Minnesota's 10,000 lakes, *Remote Sens. Environ.*, 112, 4086–4097, <https://doi.org/10.1016/j.rse.2007.12.013>, 2008.

Olmanson, L. G., Page, B. P., Finlay, J. C., Brezonik, P. L., Bauer, M. E., Griffin, C. G. and Hozalski, R. M.: Regional measurements and spatial/temporal analysis of CDOM in 10,000+ optically variable Minnesota lakes using Landsat 8 imagery, *Sci. Total Environ.*, 724, 138141, <https://doi.org/10.1016/j.scitotenv.2020.138141>, 2020.

Pahlevan, N., Balasubramanian, S., Sarkar, S. and Franz, B.: Toward Long-Term Aquatic Science Products from Heritage Landsat Missions, *Remote Sens.*, 10, 1337, <https://doi.org/10.3390/rs10091337>, 2018.

Topp, S. N., Pavelsky, T. M., Stanley, E. H., Yang, X., Griffin, C. G. and Ross, M. R. V.: Multi-decadal improvement in US Lake water clarity, *Environ. Res. Lett.*, 16, 055025, <https://doi.org/10.1088/1748-9326/abf002>, 2021.

Zheng, G. and DiGiacomo, P. M.: Detecting phytoplankton diatom fraction based on the spectral shape of satellite-derived algal light absorption coefficient, *Limnol. Oceanogr.*, 63, 1 <https://doi.org/10.1002/lno.10725>, 2017.

Zhu, Z., Wang, S. and Woodcock, C. E.: Improvement and expansion of the Fmask algorithm: cloud, cloud shadow, and snow detection for Landsats 4–7, 8, and Sentinel 2 images, *Remote Sens. Environ.*, 159, 269–277, <https://doi.org/10.1016/j.rse.2014.12.014>, 2015.
