# Supplementary material for: Riverine Sediment Response to Deforestation in the Amazon Basin
Source: Copernicus journal article supplement (doi:10.5194/egusphere-2023-2271), 2023-11-08
Supplement: Supplementary file [file egusphere-2023-2271-AC2-supplement.pdf]

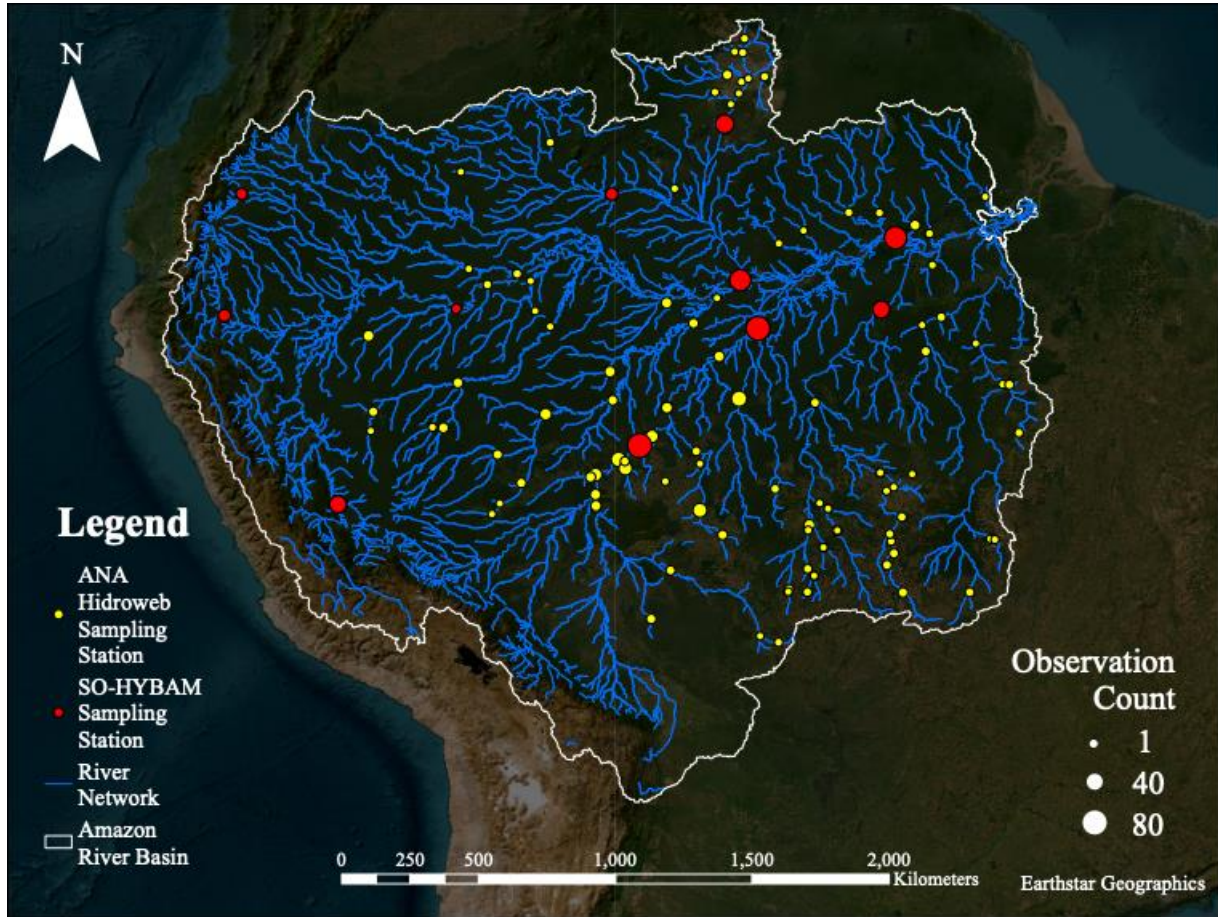

Figure 3. Location of match up sampling points for training the XGBoost Model. Number of match up observations are indicated by point size.
